# Supplementary material for: Epidemiology and Economic Burden of Atopic Dermatitis: Real-World Retrospective Data from a Large Nationwide Israeli Healthcare Provider Database
Source: PubMed Central journal article supplement — Adv Ther. 2022 Mar 29;39(6):2502–14. doi: 10.1007/s12325-022-02120-6 (PMC9329417; doi:10.1007/s12325-022-02120-6), 2022-03-29

## **SUPPLEMENTARY MATERIAL**

### **Epidemiology and Economic Burden of Atopic Dermatitis: Real-World Retrospective Data from a Large Nationwide Israeli Healthcare Provider Database**

**Authors:** Clara Weil,<sup>1</sup> Philip B. Sugerman,<sup>2\*</sup> Gabriel Chodick,<sup>1,3</sup> Huifang Liang,<sup>2</sup>  
Hongwei Wang, PhD,<sup>2</sup> Brian M. Calimlim,<sup>2</sup> Ana Dorfman,<sup>4</sup> Varda Shalev,<sup>1\*,3</sup> Dan  
Ben Amitai,<sup>3,5</sup> Yael A. Leshem<sup>3,6</sup>

\*At the time of this research.

#### **Affiliations:**

<sup>1</sup>Maccabi Institute for Research & Innovation (Maccabitech), Maccabi Healthcare Services, Tel Aviv, Israel; <sup>2</sup>AbbVie Inc., North Chicago, IL, USA; <sup>3</sup>Sackler Faculty of Medicine, Tel Aviv University, Tel Aviv, Israel; <sup>4</sup>AbbVie Israel, Hod Hasharon, Israel; <sup>5</sup>Pediatric Dermatology, Schneider Children's Medical Center of Israel, Petah Tikva, Israel; <sup>6</sup>Division of Dermatology, Rabin Medical Center, Petah Tikva, Israel

#### **Corresponding author**

Clara Weil

Epidemiology and Database Research

Maccabi Institute for Research & Innovation (Maccabitech)

Maccabi Healthcare Services

27 Hamered St, 6812509 Tel Aviv, Israel

**Table S1.** Treatment patterns in patients with atopic dermatitis stratified by age and AD severity

| Dispensed in 2013–2017, after first AD diagnosis |    | Age <6 mo |             |            | Age 6 mo–<12 y |             |             | Age 12– <18 y |             |             | Age ≥18 y |             |             | Total  |             |             |
|--------------------------------------------------|----|-----------|-------------|------------|----------------|-------------|-------------|---------------|-------------|-------------|-----------|-------------|-------------|--------|-------------|-------------|
|                                                  |    | Mild      | Moderate    | Severe     | Mild           | Moderate    | Severe      | Mild          | Moderate    | Severe      | Mild      | Moderate    | Severe      | Mild   | Moderate    | Severe      |
| n                                                |    | 177       | 16          | 0          | 32740          | 14,704      | 2208        | 7724          | 4817        | 400         | 13,884    | 14,680      | 3133        | 54,525 | 34,217      | 5741        |
| TCS, %                                           |    |           |             |            |                |             |             |               |             |             |           |             |             |        |             |             |
| Low potency                                      | ≥1 | 39.0      | 43.8        | 0.0        | 50.2           | 63.1        | 76.6        | 40.5          | 51.8        | 60.8        | 36.3      | 54.8        | 67.2        | 45.2   | 57.9        | 70.4        |
|                                                  | ≥2 | 8.5       | 18.8        | 0.0        | 21.6           | 35.5        | 52.1        | 14.8          | 25.3        | 34.3        | 14.1      | 30.6        | 44.1        | 18.7   | 32.0        | 46.5        |
| Mid potency                                      | ≥1 | 18.1      | 56.3        | 0.0        | 23.9           | 74.5        | 81.3        | 23.0          | 69.6        | 75.8        | 20.4      | 64.9        | 72.7        | 22.9   | 69.7        | 76.2        |
|                                                  | ≥2 |           | <b>31.3</b> | 0.0        |                | <b>44.7</b> | 55.7        |               | <b>38.7</b> | 50.3        |           | <b>36.8</b> | 48.3        |        | <b>40.5</b> | 51.3        |
| High potency                                     | ≥1 | 22.0      | 50.0        | 0.0        | 25.5           | 74.9        | 74.6        | 32.3          | 82.9        | 83.0        | 43.3      | 90.2        | 91.7        | 31.0   | 82.6        | 84.5        |
|                                                  | ≥2 |           | <b>31.3</b> | 0.0        |                | <b>45.3</b> | 47.7        |               | <b>56.4</b> | 64.5        |           | <b>71.0</b> | 77.8        |        | <b>57.9</b> | 65.3        |
| TCI, %                                           | ≥1 | 6.2       | 31.3        | 0.0        | 6.7            | 18.7        | 25.4        | 5.9           | 18.2        | 30.8        | 7.0       | 16.6        | 19.9        | 6.7    | 17.7        | 22.8        |
|                                                  | ≥2 |           | <b>18.8</b> | 0.0        |                | <b>9.0</b>  | 12.6        |               | <b>8.2</b>  | 18.5        |           | <b>7.3</b>  | 10.4        |        | <b>8.2</b>  | 11.8        |
| Phototherapy, %                                  | ≥1 |           | <b>0.0</b>  | 0.0        |                | <b>0.6</b>  | 1.1         |               | <b>2.2</b>  | 6.0         |           | <b>5.2</b>  | 10.8        |        | <b>2.8</b>  | 6.8         |
| SI, %                                            |    |           |             |            |                |             |             |               |             |             |           |             |             |        |             |             |
| AZA                                              | ≥1 |           |             | <b>0.0</b> |                |             | <b>0.2</b>  |               |             | <b>5.3</b>  |           |             | <b>3.9</b>  |        |             | <b>2.6</b>  |
| CsA                                              | ≥1 |           |             | <b>0.0</b> |                |             | <b>0.5</b>  |               |             | <b>3.0</b>  |           |             | <b>2.5</b>  |        |             | <b>1.7</b>  |
| MTX                                              | ≥1 |           |             | <b>0.0</b> |                |             | <b>1.3</b>  |               |             | <b>9.3</b>  |           |             | <b>9.7</b>  |        |             | <b>6.4</b>  |
| MM                                               | ≥1 |           |             | <b>0.0</b> |                |             | <b>0.2</b>  |               |             | <b>0.5</b>  |           |             | <b>1.4</b>  |        |             | <b>0.9</b>  |
| SC, %                                            | ≥1 | 2.8       | 0.0         | 0.0        | 18.8           | 17.5        | 99.5        | 9.9           | 11.1        | 92.3        | 14.9      | 18.6        | 94.7        | 16.5   | 17.1        | 96.3        |
|                                                  | ≥2 | 0.0       |             | 0.0        | 7.3            |             | 99.1        | 3.3           |             | 91.5        | 5.2       |             | 92.5        | 6.2    |             | 95.0        |
| With moderate AD criteria                        | ≥2 |           |             | <b>0.0</b> |                |             | <b>98.6</b> |               |             | <b>88.8</b> |           |             | <b>90.6</b> |        |             | <b>93.5</b> |

AD, atopic dermatitis; AZA, azathioprine; CsA, cyclosporine; MM, mycophenolate mofetil; MTX, methotrexate; SI, systemic immunomodulators; SC, systemic corticosteroids; TCI, topical calcineurin inhibitor; TCS, topical corticosteroids.

Bold numbers correspond to those used in the AD severity study definition

**Figure S1.** Selection of the AD study populations. AD, atopic dermatitis; MHS, Maccabi Healthcare Services; Y, year.

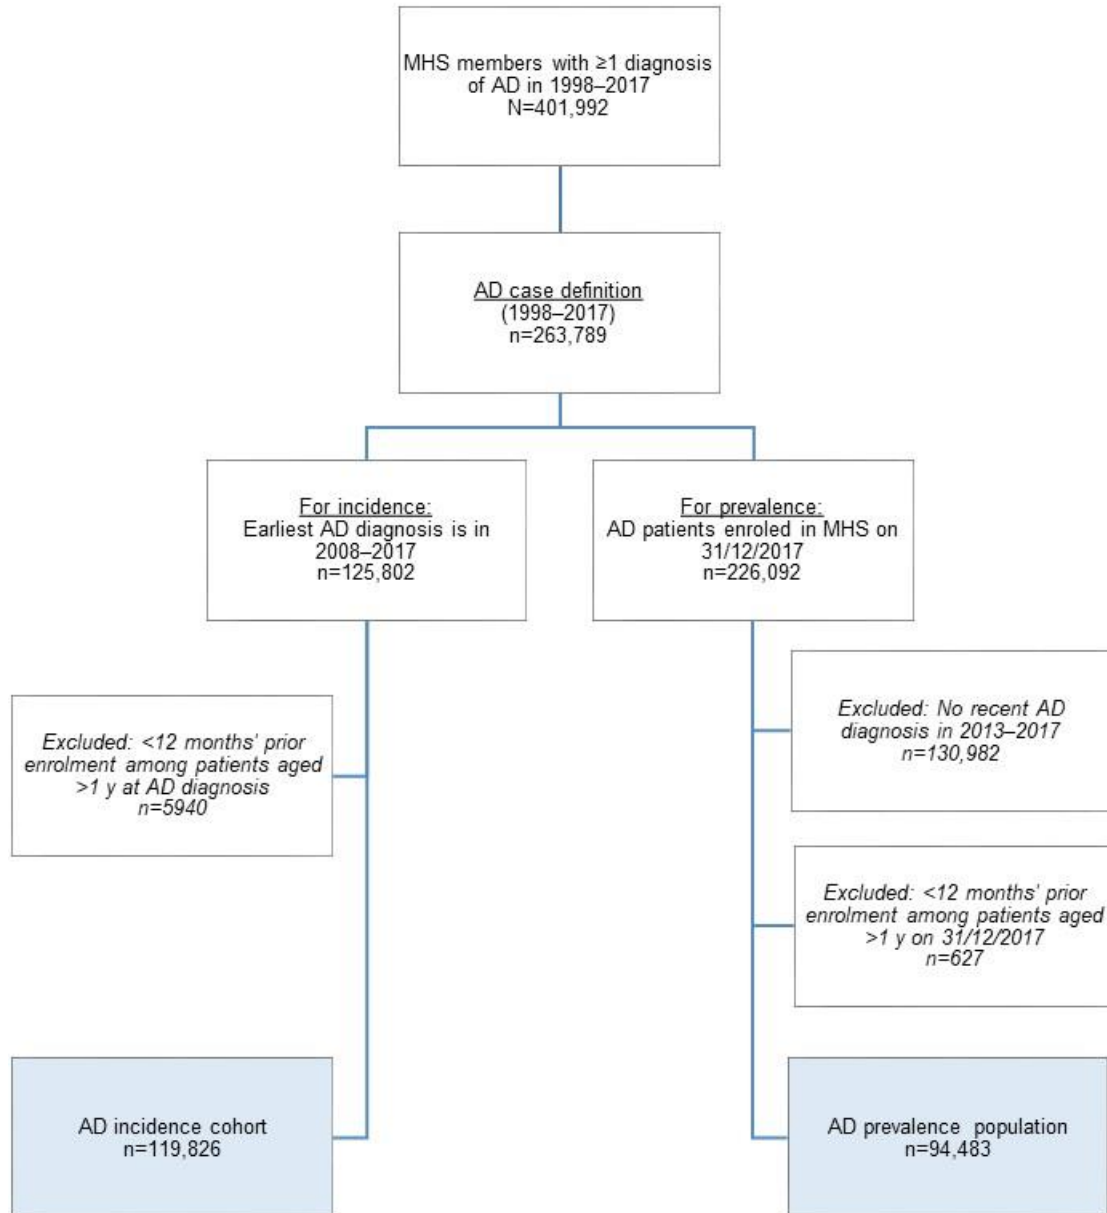

**Figure S2.** Age-specific incidence of AD by year (2008–2017). AD, atopic dermatitis; MHS, Maccabi Healthcare Services; mo, months; y, years.

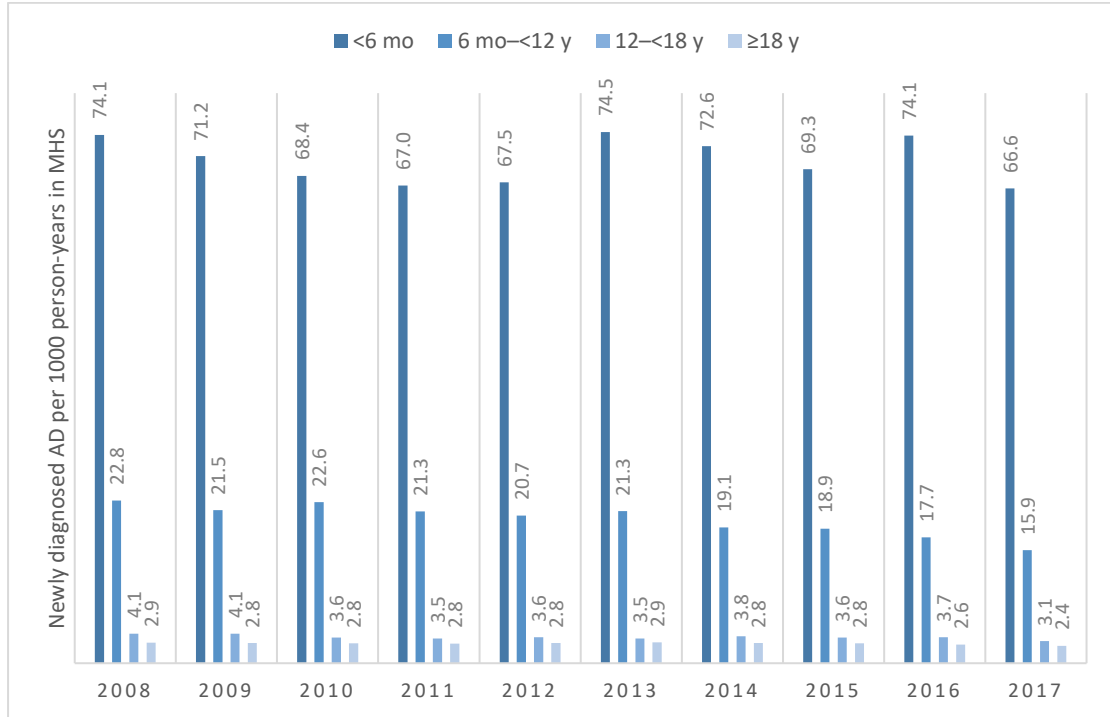

**Figure S3.** Age-specific prevalence of AD by 5-year age groups (31 December 2017).

AD, atopic dermatitis; MHS, Maccabi Healthcare Services; y, years.

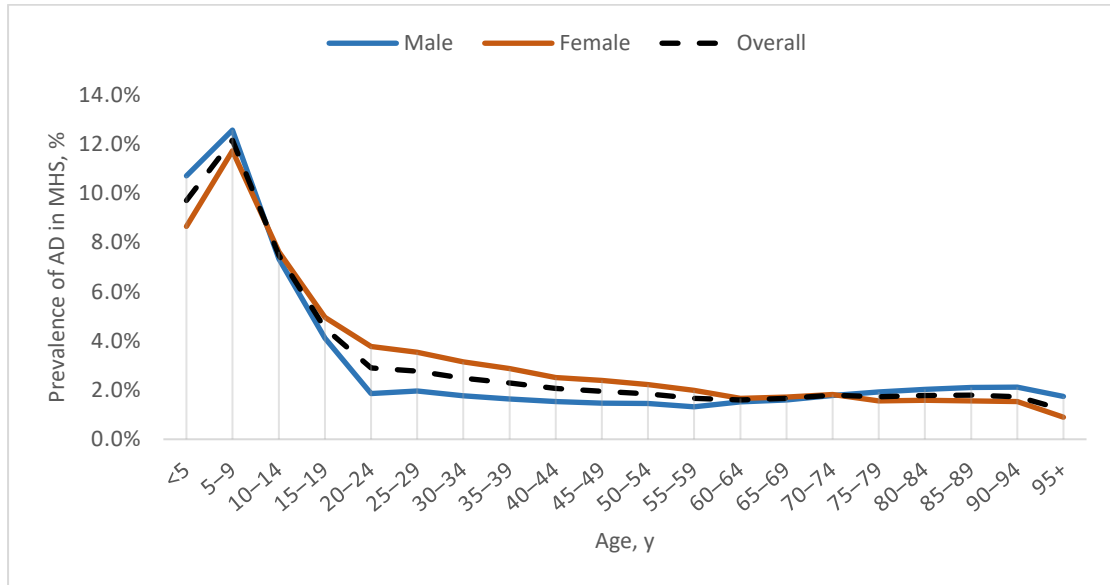

**Figure S4.** Age-specific prevalence of AD in Israel\* by severity (31 December 2017).

AD, atopic dermatitis; MHS, Maccabi Healthcare Services; mo, months; y, years.

\*MHS is a nationwide healthcare insurer and provider with >2.3 million members in 2017.

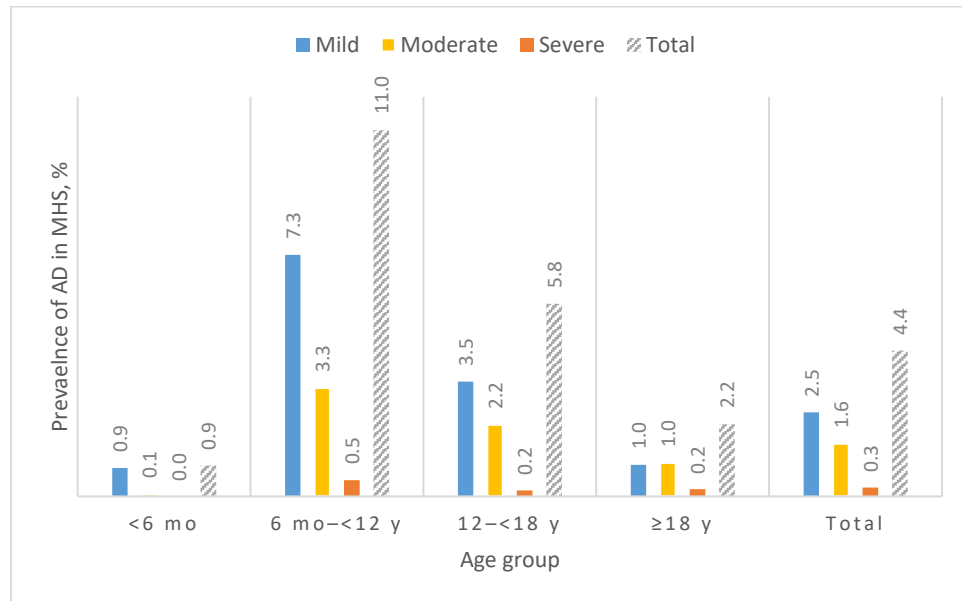

**Figure S5.** Comparison of annual direct medical costs among AD prevalence population versus non-AD matched controls in 2017 (N=92,632 matched pairs): (A) total population-level costs by healthcare resource (unadjusted), (B) estimated mean per-person costs per year (adjusted for age, sex, and residential area). All costs are 2017 US dollars. AD, atopic dermatitis; ER, emergency room; MHS, Maccabi Healthcare Services; mo, months; PCP, primary care physician; y, years.

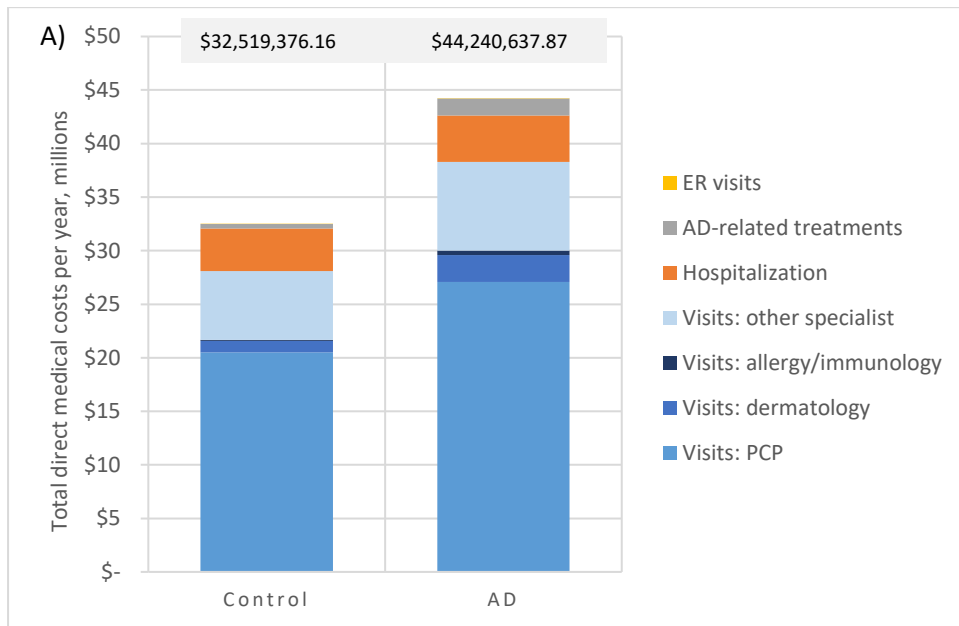

B)

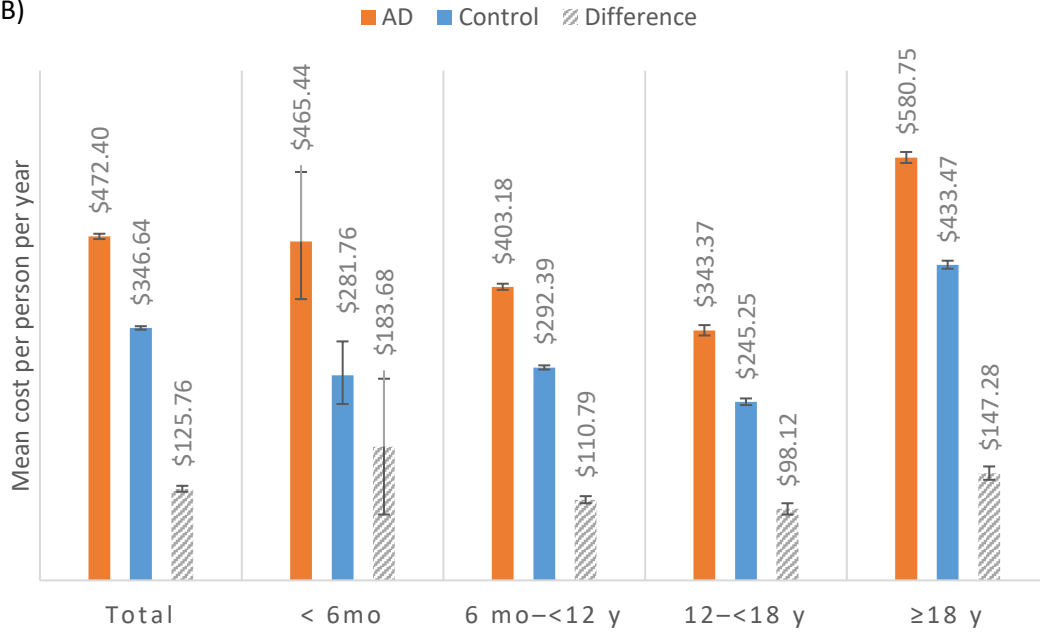

Supplement: 12325_2022_2120_MOESM1_ESM.pdf [file 12325_2022_2120_MOESM1_ESM.pdf]
